# Supplementary material for: Insights into docking in megasynthases from the investigation of the toblerol trans -AT polyketide synthase: many α-helical means to an end
Source: Royal Society of Chemistry journal article supplement (doi:10.1039/d4cb00075g), 2024-01-01
Supplement: d4cb00075g1.pdf [file d4cb00075g1.pdf]

## Supplementary Information

### **Insights into docking in megasynthases from investigation of the toblerol *trans*-AT polyketide synthase: many $\alpha$ -helical means to an end†**

Serge Scat,<sup>a</sup> Kira J. Weissman<sup>\*a</sup> and Benjamin Chagot<sup>\*a</sup>

Université de Lorraine, CNRS, IMoPA, F-54000 Nancy, France

\* E-mail: kira.weissman@univ-lorraine.fr and Benjamin.chagot@univ-lorraine.fr

## Supplementary Figures

**a**

**TobC<sup>C</sup>DD**

Conf: 998899975110242589999999989977401020345453999999998619

Pred: CCCCCCCCCCHHCCCCCCCCCCCCCCCCCCCCCEEECCCCC**HHHHHHHHH**HCC

AA: LPAENEDPDKAVVDLHRSPPKTKDPLTPSGIIAKVKAGDMTQETARELLLAMR

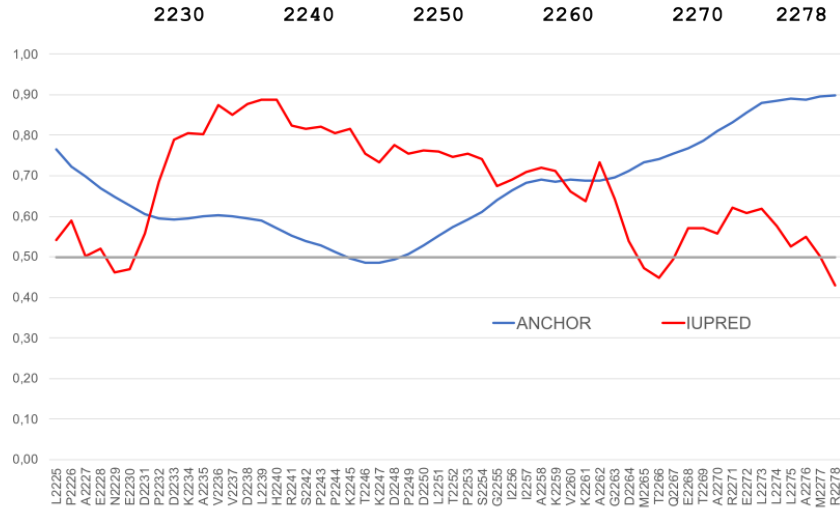

**b**

**TobE<sup>N</sup>DD**

Conf: 9842335553003358998999999989995678999988779

Pred: CCCCCCCCCCCCCCCCC**HHHHHHHHH**HCCCCCCCCC

AA: MTHFEDHRVGSRLAADGEISADEALSMLDAIGTGQSTPTGADD

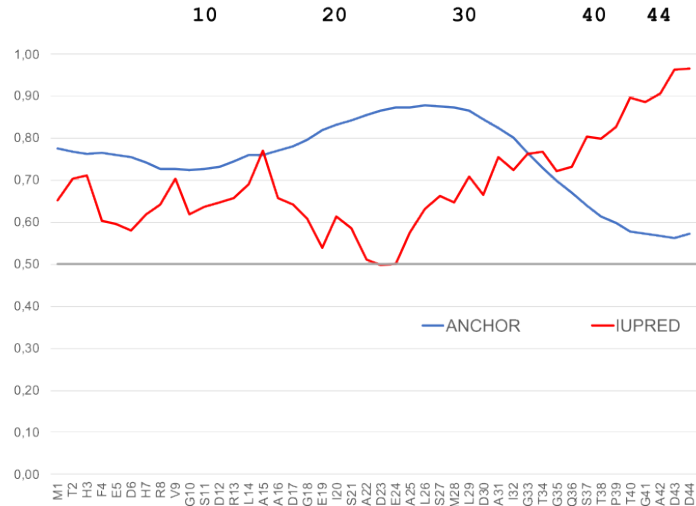

**Fig. S1** Bioinformatics analysis of the TobC/TobE interface. The analyses of TobC<sup>C</sup>DD and TobE<sup>N</sup>DD are shown in panels (a) and (b), respectively. Secondary structure prediction was carried out using PSIPRED (top, with potential  $\alpha$ -helices indicated in red),<sup>1</sup> and the intrinsic disorder/interaction propensity prediction was predicted using the IUPred2A interface<sup>2</sup> (bottom). IUPred2 indicates the disorder tendency of each residue in a given protein, with higher values corresponding to a higher probability of disorder. ANCHOR2 predicts the probability of each residue belonging to a region involved in binding. Key: Conf. is the confidence score of the prediction (from 0 (lowest) to 9 (highest)); Pred. is the type of secondary structure predicted (C = coil, H = helix and E = sheet); AA is the amino acid sequence.

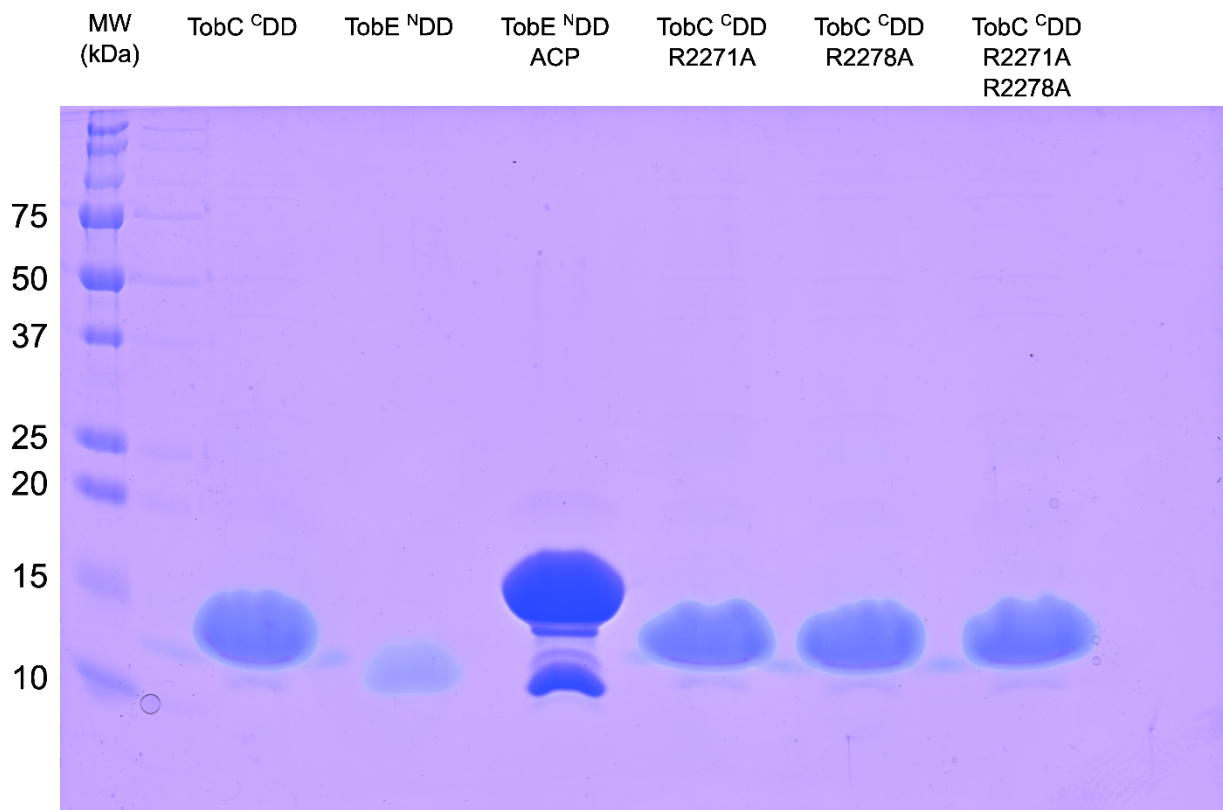

**Fig. S2** SDS-PAGE analysis of the constructs used in this study. TobC<sup>C</sup>DD (calc'd: 6.64 kDa); TobE<sup>N</sup>DD (calc'd: 5.02 kDa); TobE<sup>N</sup>DD-ACP (calc'd: 14.71 kDa); TobC<sup>C</sup>DD R2271A (calc'd: 6.55 kDa); TobC<sup>C</sup>DD R2278A (calc'd: 6.55 kDa); TobC<sup>C</sup>DD R2271A/R2278A (calc'd: 6.47 kDa). The molecular weights of the markers are indicated.

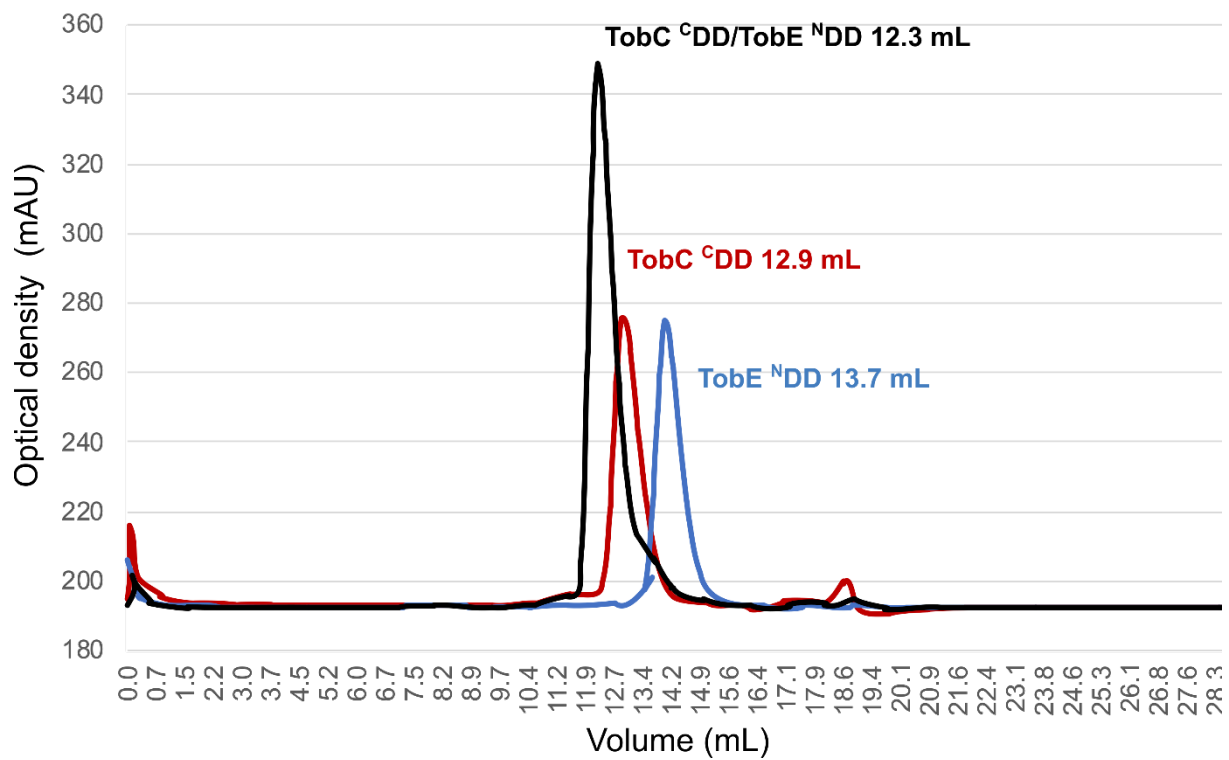

**Fig. S3** Gel filtration analysis of the interaction between TobC<sup>C</sup>DD and TobE<sup>N</sup>DD (both at 400  $\mu$ M). TobC<sup>C</sup>DD eluted at a volume of 12.9 mL and TobE<sup>N</sup>DD at 13.7 mL. When mixed (individual concentrations of 400  $\mu$ M), a single peak was observed at a lower elution volume of 12.3 mL, consistent with formation of a complex.

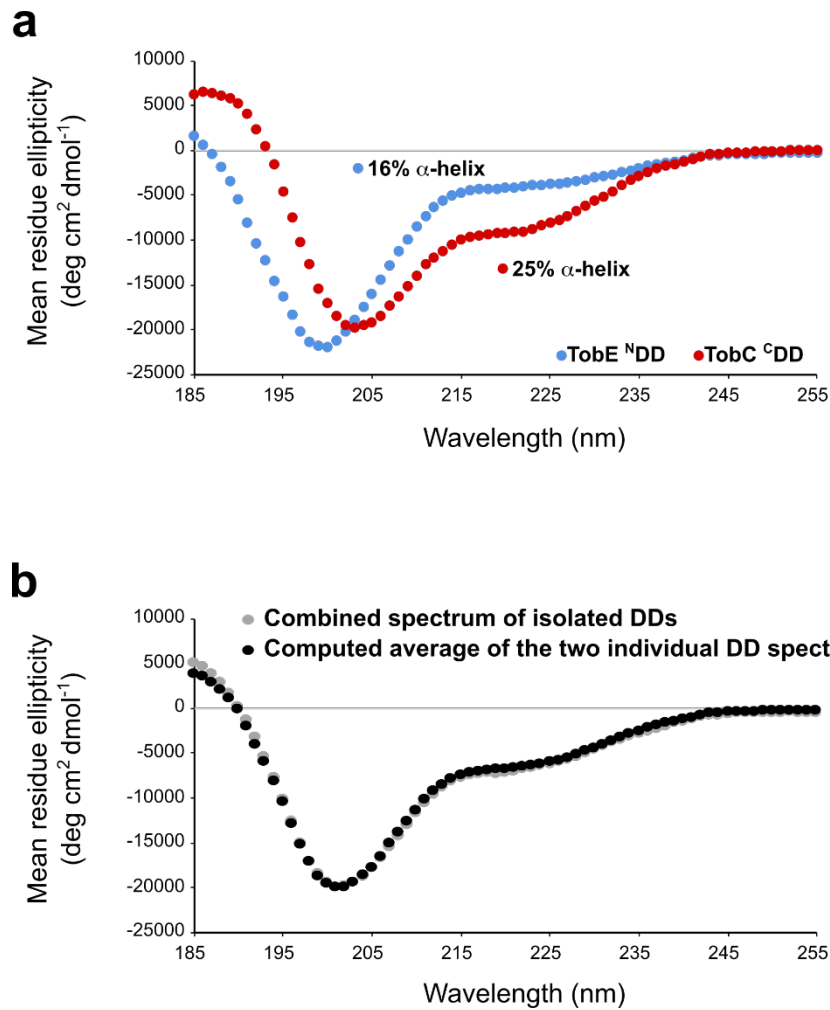

**Fig. S4** Circular dichroism analysis of TobE<sup>NDD</sup> and TobC<sup>CDD</sup>. (a) Circular dichroism analysis of individual TobC<sup>CDD</sup> and TobE<sup>NDD</sup> (100  $\mu$ M). The %  $\alpha$ -helix calculated using the Pro-Data Viewer software (Applied Photophysics) under the two conditions is indicated. (b) CD analysis showing the superposition of the combined spectrum of the isolated DDs and the computed average of the two individual DD spectra.

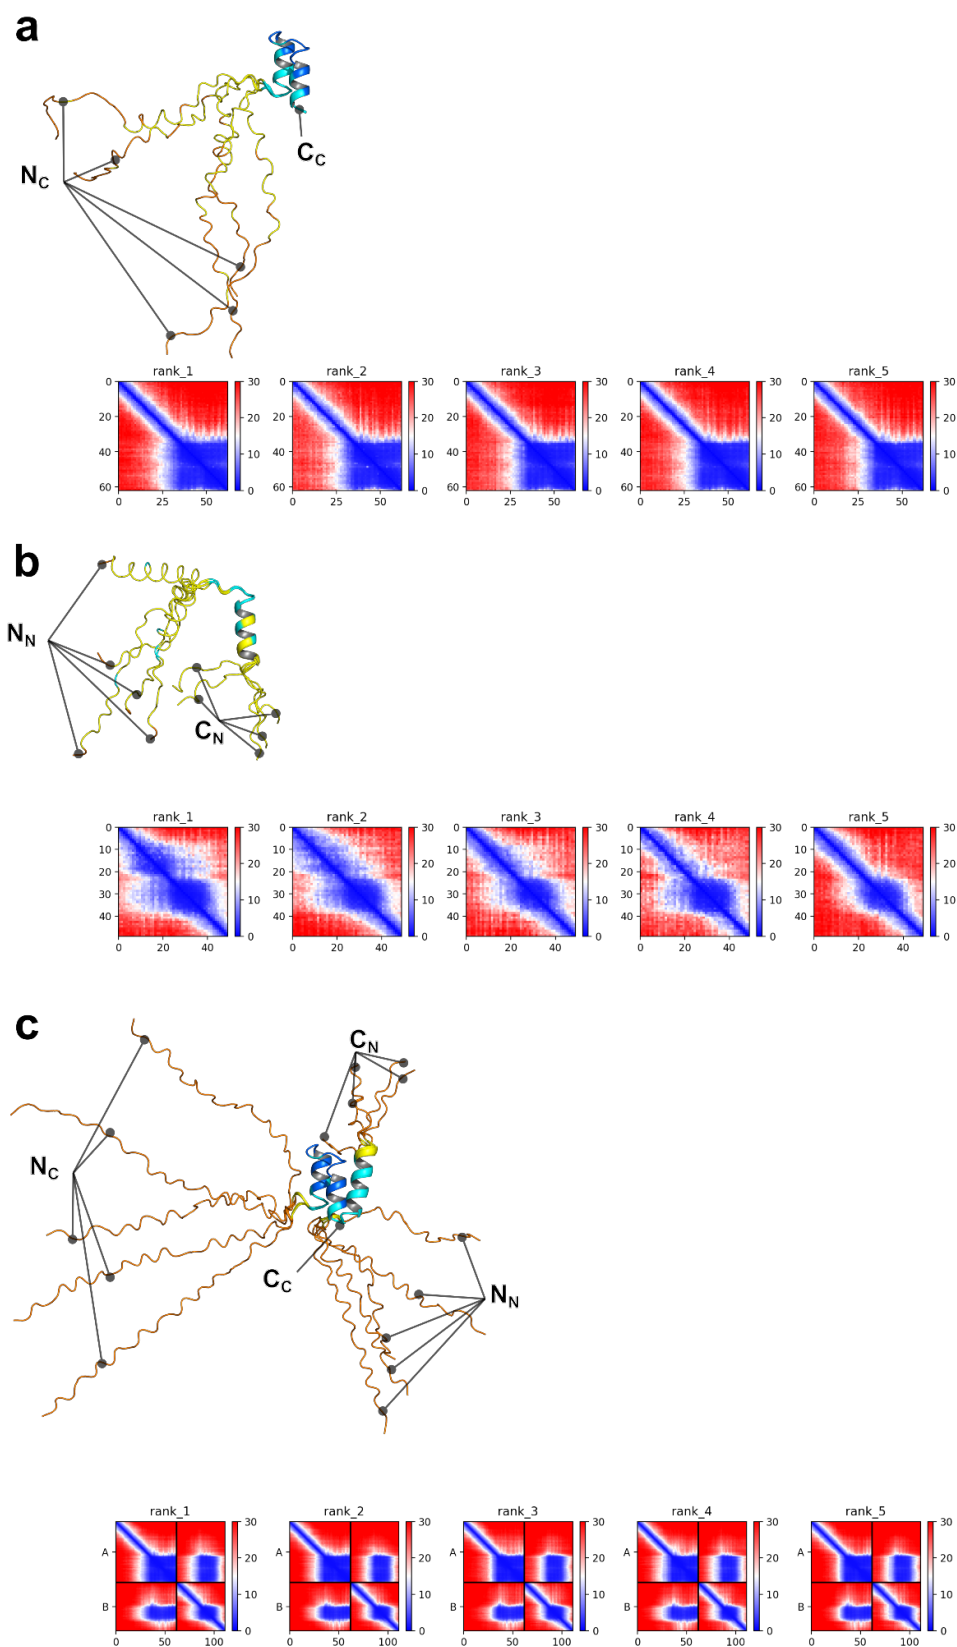

**Fig. S5** AlphaFold2<sup>3</sup> structure predictions (top) and associated PAE Matrix Score (bottom). (a) Prediction for TobC<sup>CDD</sup>. (b) Prediction for TobE<sup>NDD</sup>. (c) Prediction for the TobE<sup>NDD</sup>/TobC<sup>CDD</sup> complex. All models have been relaxed using Amber. The five predicted models are superimposed and the residues are colored according to a per-residue confidence metric called pLDDT:<sup>3</sup> very high (pLDDT > 90) (blue), confident (90 > pLDDT > 70) (cyan), low (70 > pLDDT > 50) (yellow) and very low (pLDDT < 50) (orange). The N- and C- termini of the models are labeled (N<sub>C</sub> and C<sub>C</sub> for the <sup>CDD</sup> and N<sub>N</sub> and C<sub>N</sub> for the <sup>NDD</sup>).

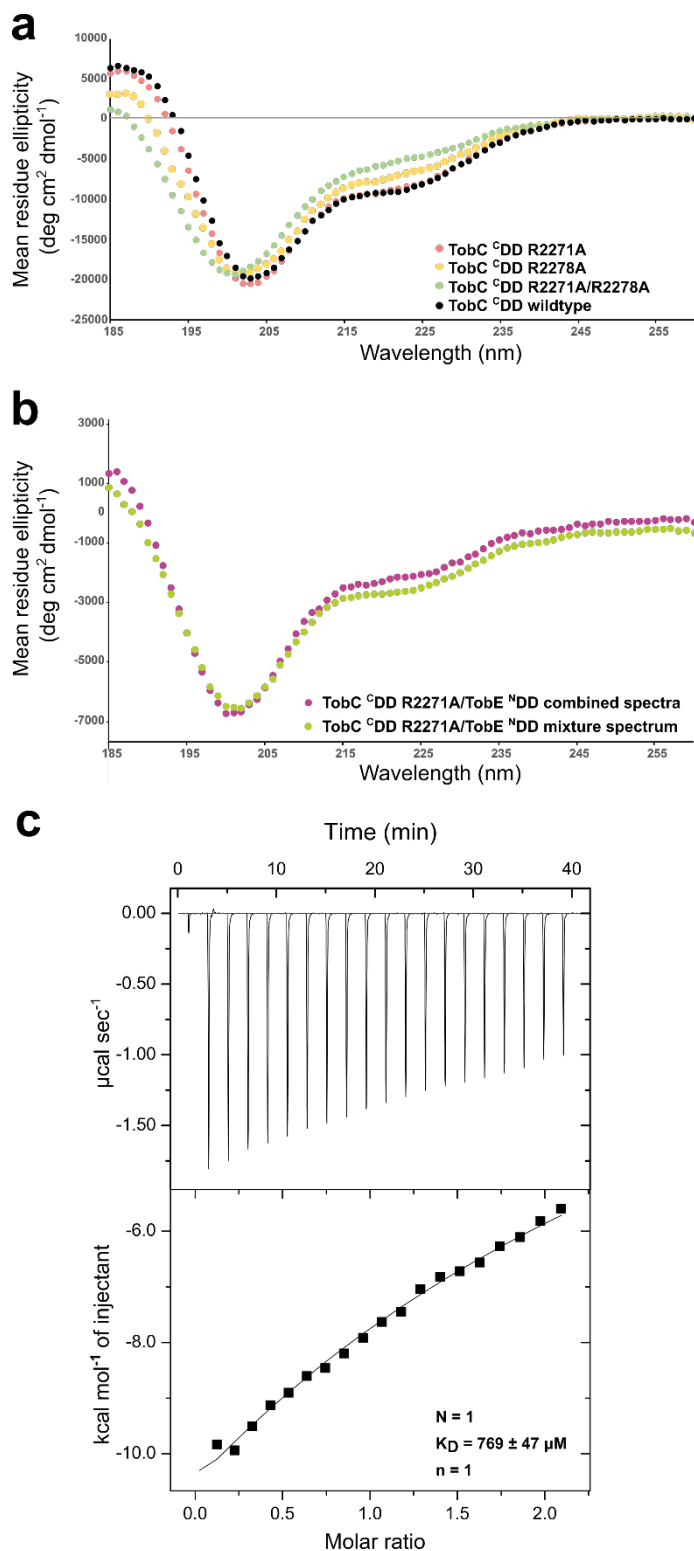

**Fig. S6** ITC and CD analysis of single point mutations. (a) CD analysis of TobC<sup>CDD</sup> mutants at 100 μM. TobC<sup>CDD</sup> wildtype is shown in black. (b) CD analysis for structuration upon mixing TobC<sup>CDD</sup> R2271A mutant and TobE<sup>NDD</sup>. The combined spectrum was obtained by simultaneously analyzing the two isolated docking domains (both at 100 μM). Comparison with the spectrum of a mixture of the two DDs (again at an overall concentration of 100 μM), demonstrates a lack of increased structuration upon mixing. (c) Analysis by ITC of binding between the mutant TobC<sup>CDD</sup> R2271A in the syringe and TobE<sup>NDD</sup> in the cell. To ensure data fitting, the stoichiometry was set to 1.

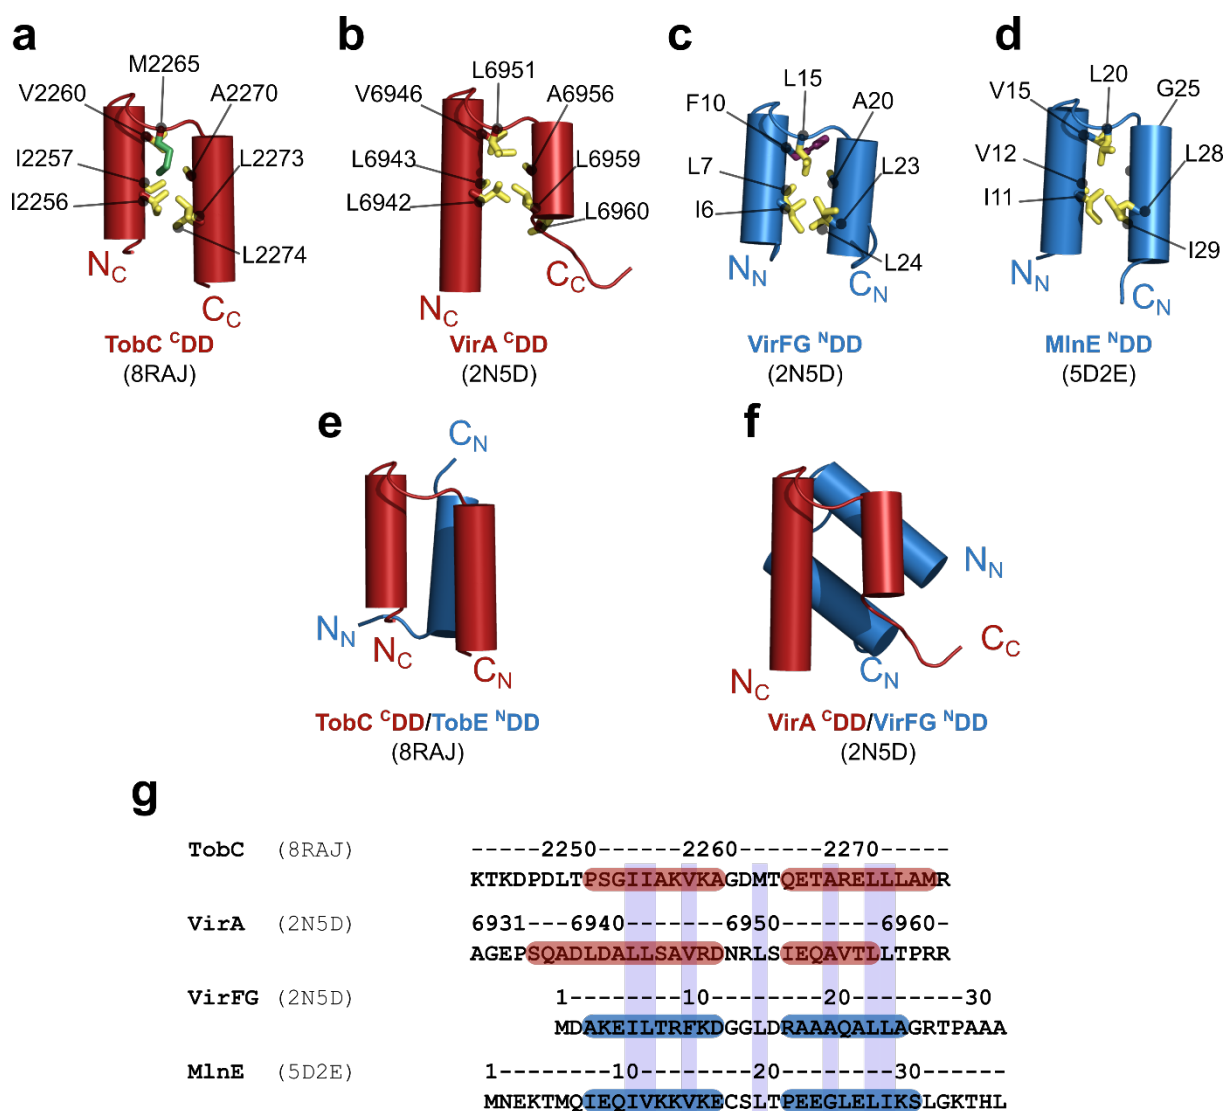

**Fig. S7** Comparison between 4  $\alpha$ -helix bundle (4HB) docking domains and the TobC<sup>CDD</sup>/TobE<sup>NDD</sup> complex fold. (a) TobC<sup>CDD</sup>. (b) VirA<sup>CDD</sup> (PDB ID: 2N5D<sup>4</sup>). (c) VirFG<sup>NDD</sup> (PDB ID: 2N5D<sup>4</sup>). (d) MlnE<sup>NDD</sup> (PDB ID: 5D2E<sup>3</sup>). (e)–(f) Structures and comparison between Vir and Tob docking complexes. (e) Complex between TobC<sup>CDD</sup> (red) and TobE<sup>NDD</sup> (blue). (f) Complex between VirA<sup>CDD</sup> (grey) and VirFG<sup>NDD</sup> (purple). (g) Sequence alignment between TobC<sup>CDD</sup> and 4HB docking domains. The <sup>CDD</sup> and <sup>NDD</sup>  $\alpha$ -helices are colored red and blue, respectively.



**a**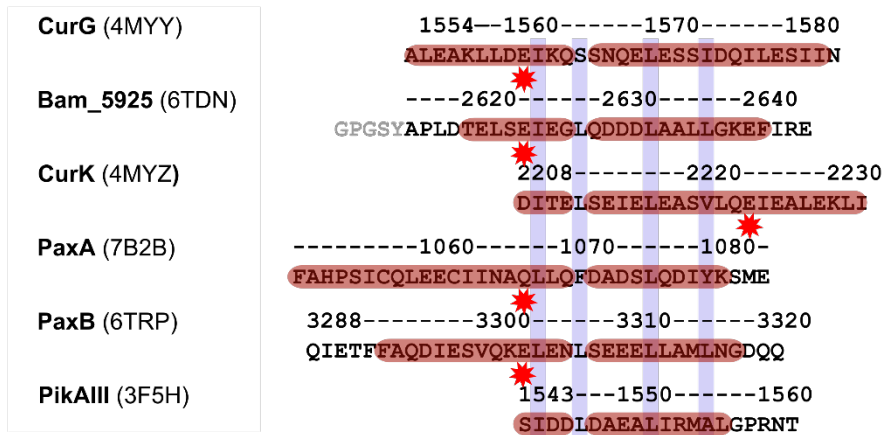**b**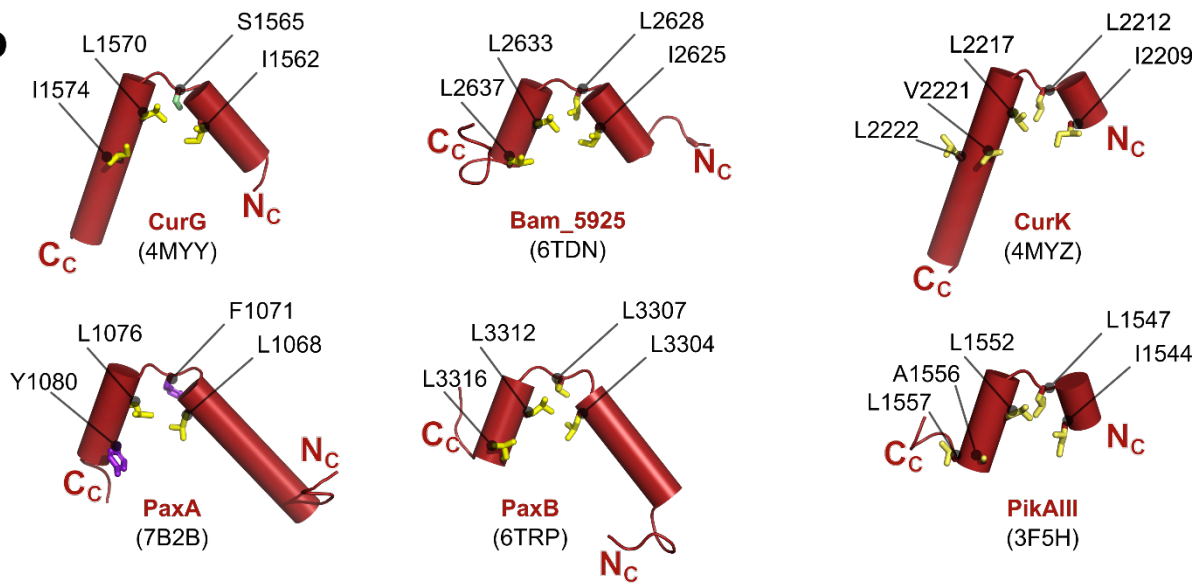

**C**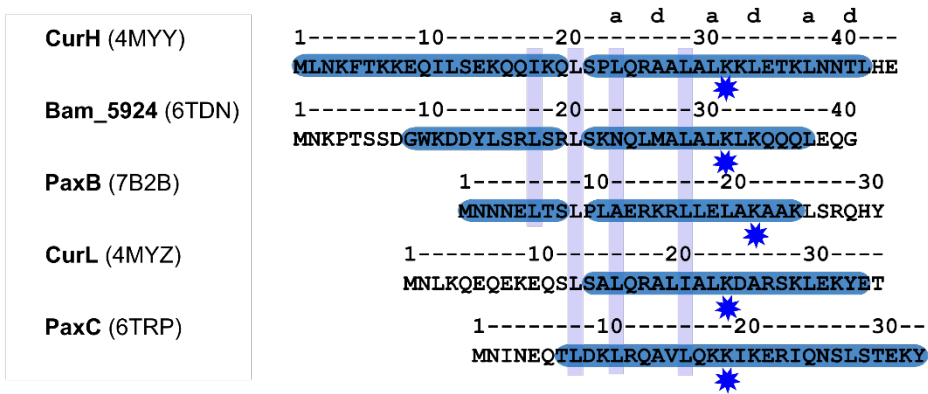**d**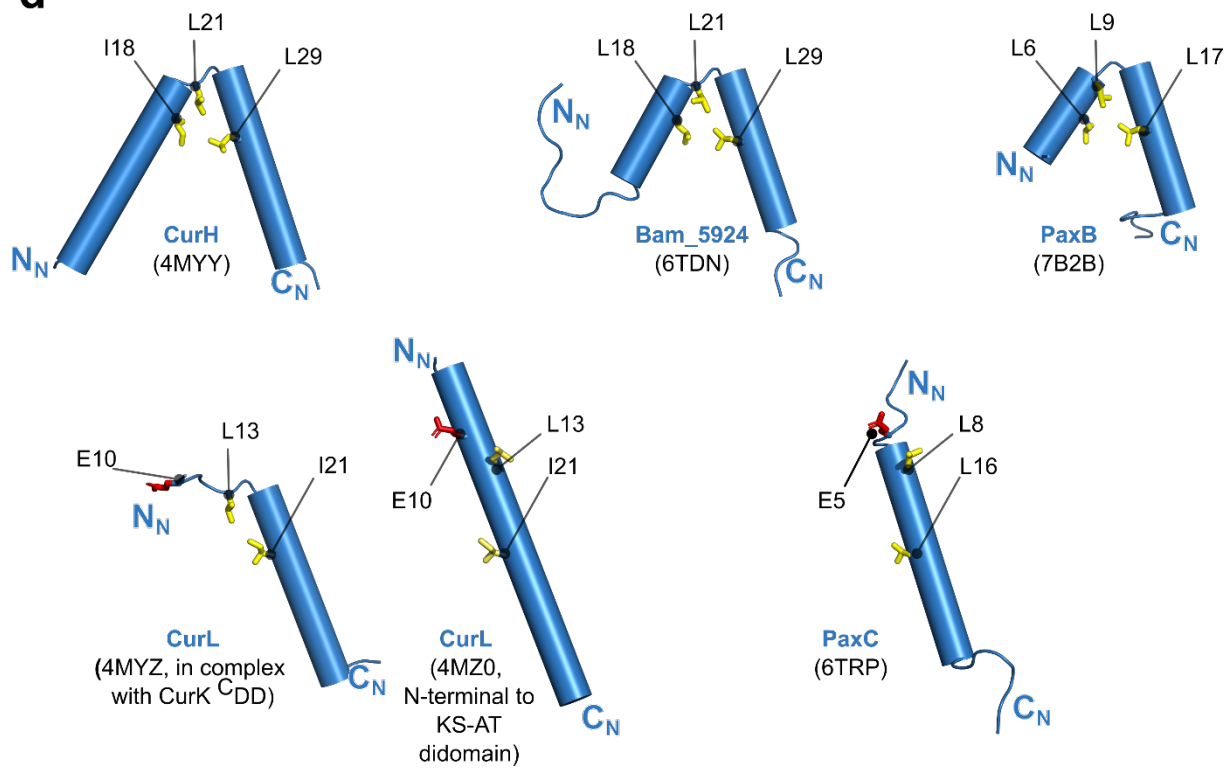

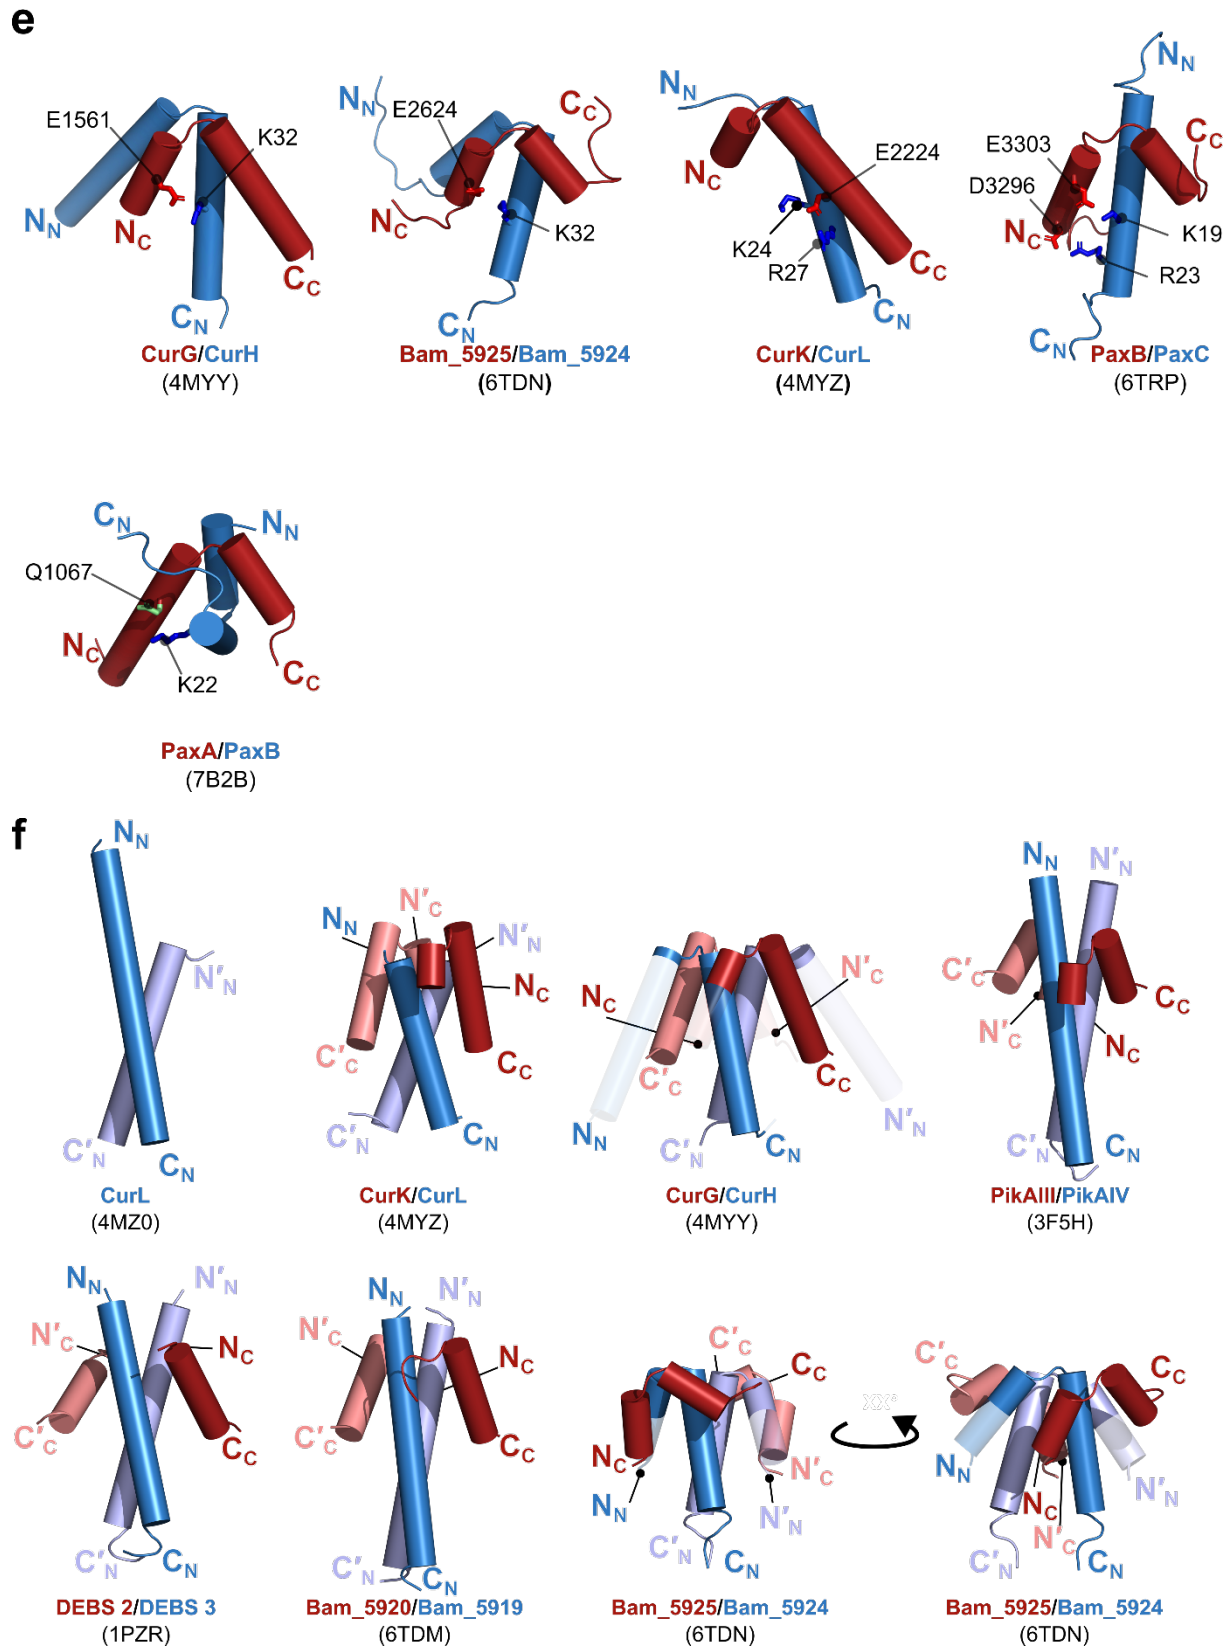

**Fig. S8** Sequence and structure comparison of individual and complexed DDs. (a) Sequence alignment of type 2(-related) <sup>C</sup>DDs whose structures have been determined. The strips highlight the conserved aliphatic residues. Conserved residues mediating electrostatic interactions are highlighted by a star. (b) Structure comparison of type 2(-related) <sup>C</sup>DDs (aliphatic residues are colored in yellow and aromatic in purple) and the  $\alpha$ -helices are represented as cylinders. The <sup>C</sup>DD names and PDB codes of the structures are indicated. (c) Sequence alignment of type 2(-related) <sup>N</sup>DDs whose structures have been determined. Conserved aliphatic residues are highlighted by a blue strip. The letters a and d indicate the first and fourth residues of the heptad repeats. (d) Structure comparison of type 2(-

related)<sup>N</sup>DDs. Conserved residues are indicated on the structures in stick form (aliphatic residues are colored in yellow and acidic in red), and the  $\alpha$ -helices are represented as cylinders. The <sup>N</sup>DD names and PDB codes of the structures are indicated. (e) Structure comparison of type 2(-related) <sup>C</sup>DD/<sup>N</sup>DD complexes. The names of the DDs are indicated, with <sup>C</sup>DDs colored red and <sup>N</sup>DDs colored blue. Conserved residues participating in electrostatic interactions are represented as sticks and are labeled and numbered, with basic residues colored blue, acidic red and polar green.  $\alpha$ -Helices are represented as cylinders, and the N- and C-termini are labeled. (f) Structure comparisons of type 2(-related) and type 1(-related) <sup>C</sup>DD/<sup>N</sup>DD complexes (alongside the coiled-coil formed by extended CurL <sup>N</sup>DD). The names of the DDs are indicated with <sup>C</sup>DDs colored red and <sup>N</sup>DDs colored blue.  $\alpha$ -Helices are represented as cylinders, and the N- and C-termini are labeled.

## Supplementary Tables

**Table S1** Sequences of constructs used in this study, and calculated molecular weights

| Construct                             | Sequence <sup>a</sup>                                                                                                                                 | Molecular weight |
|---------------------------------------|-------------------------------------------------------------------------------------------------------------------------------------------------------|------------------|
| TobE <sup>N</sup> DD                  | GPGSYMTHFEDHRVGS DRLAADGEISADEALSMLDAIG<br>TGQSTPTGADD                                                                                                | 5023.32 Da       |
| TobC <sup>C</sup> DD                  | GPGSPNSYLPAENEDPDKAVVDLHRSPPKTKDPLTPS<br>GIIAKVKAGDMTQETARELLAMR                                                                                      | 6640.50 Da       |
| TobE <sup>N</sup> DD-ACP              | GPGSMTHFEDHRVGS DRLAADGEISADEALSMLDAIGT<br>GQSTPTGADDLKARIVQDLGLLIASVLKLQLEDLSPGRT<br>WMDYGLDSIASTELATLTFTEKYGLSLPPTIFFEFQNIDSF<br>ADYLLSSHRVQLEKKYSV | 14712.50 Da      |
| TobC <sup>C</sup> DD R2271A           | GPGSPNSYLPAENEDPDKAVVDLHRSPPKTKDPLTPS<br>GIIAKVKAGDMTQETA <sup>A</sup> EELLAMR                                                                        | 6555.39 Da       |
| TobC <sup>C</sup> DD R2278A           | GPGSPNSYLPAENEDPDKAVVDLHRSPPKTKDPLTPS<br>GIIAKVKAGDMTQETA <sup>A</sup> EELLAMA <sup>A</sup>                                                           | 6555.39 Da       |
| TobC <sup>C</sup> DD<br>R2271A-R2278A | GPGSPNSYLPAENEDPDKAVVDLHRSPPKTKDPLTPS<br>GIIAKVKAGDMTQETA <sup>A</sup> EELLAMA <sup>A</sup>                                                           | 6470.29 Da       |

<sup>a</sup>Red: sequence introduced from the cloning procedure; green: added Tyr residue; yellow: introduced mutation.

**Table S2** Primers used in this study

| Construct                   | Primer Type | Oligonucleotide (5'-3') <sup>a</sup>              |
|-----------------------------|-------------|---------------------------------------------------|
| <b>Cloning</b>              |             |                                                   |
| TobE <sup>N</sup> DD        | f           | TTTCCGGGATCC <b>TAT</b> ATGACGCACTTCGAGGAC        |
|                             | r           | TTTCCGGCTAGCT <b>CAAT</b> CGTCCGCGCCGG            |
| TobC <sup>C</sup> DD        | f           | TTTCCGGAATTC <b>gTAT</b> CTACCTGCAGAGAACGAGGATCC  |
|                             | r           | TTTCCGAAGCT <b>TT</b> CAGCGCATGGCAAGCAG           |
| TobE <sup>N</sup> DD-ACP    | f           | TTTCCGGGATCC <b>AT</b> GACGCACTTCGAGGAC           |
|                             | r           | TTTCCGGCTAGCT <b>CA</b> GACCGAATACTTTTTTTCCAATTGG |
| <b>Mutagenesis</b>          |             |                                                   |
| TobC <sup>C</sup> DD R2271A | f           | CAGGAGACCGCCGCCGAGCTGCTGCTT                       |
|                             | r           | AAGCAGCAGCTCGGCGGCGGTCTCCTG                       |
| TobC <sup>C</sup> DD R2278A | f           | CTGCTGCTTGCCATGGCCTGAAAGCTTGC GGCC                |
|                             | r           | GGCCGCAAGCTTT <b>CAG</b> GCCATGGCAAGCAGCAG        |

<sup>a</sup>Introduced restriction sites are underlined and the base pairs coding for an additional Tyr or stop codon are indicated in bold. In the case of TobC<sup>C</sup>DD, an additional base (in lower case) was introduced to conserve the reading frame.

**Table S3** Structural statistics specified by the NMR Validation Task Force

| Restrains used for structure calculation                                               |                                                                                                              |                                                                   |
|----------------------------------------------------------------------------------------|--------------------------------------------------------------------------------------------------------------|-------------------------------------------------------------------|
| Distance restraints                                                                    | TobC <sup>C</sup> DD                                                                                         | TobE <sup>N</sup> DD                                              |
| Total                                                                                  | 784                                                                                                          | 394                                                               |
| Intraresidue                                                                           | 256                                                                                                          | 134                                                               |
| Sequential                                                                             | 259                                                                                                          | 165                                                               |
| Medium range                                                                           | 168                                                                                                          | 79                                                                |
| Long range                                                                             | 101                                                                                                          | 16                                                                |
| Intermolecular                                                                         | 171                                                                                                          |                                                                   |
| Dihedral angle restraints                                                              | 46                                                                                                           | 22                                                                |
| Constraint violations, mean $\pm$ SD <sup>6</sup>                                      |                                                                                                              |                                                                   |
| Distance violations                                                                    |                                                                                                              |                                                                   |
| 0.1 < d $\leq$ 0.2 Å                                                                   |                                                                                                              | 0.15 $\pm$ 0.37                                                   |
| d > 0.2 Å                                                                              |                                                                                                              | 0                                                                 |
| Average maximum distance violations (Å)                                                |                                                                                                              | 0.08 $\pm$ 0.02                                                   |
| Torsion angle violations                                                               |                                                                                                              |                                                                   |
| $\theta < = 5.0^\circ$                                                                 |                                                                                                              | 0                                                                 |
| $\theta > 5.0^\circ$                                                                   |                                                                                                              | 0                                                                 |
| Average maximum torsion angle violations ( $^\circ$ )                                  |                                                                                                              | 0.0                                                               |
| Amber energies, mean $\pm$ SD (kcal mol <sup>-1</sup> ) <sup>6</sup>                   |                                                                                                              |                                                                   |
| Distance restraint                                                                     |                                                                                                              | 1.0 $\pm$ 0.2                                                     |
| Torsion restraint                                                                      |                                                                                                              | 0.001 $\pm$ 0.005                                                 |
| Van der Waals                                                                          |                                                                                                              | -581 $\pm$ 13                                                     |
| Total molecular                                                                        |                                                                                                              | -4469 $\pm$ 14                                                    |
| Precision, RMSD from the mean (Å)                                                      |                                                                                                              |                                                                   |
|                                                                                        | TobC <sup>C</sup> DD P2249–M2277 and TobE <sup>N</sup> DD I20–A31 (defined as ordered by PSVS <sup>7</sup> ) | TobC <sup>C</sup> DD L2251–R2278 and TobE <sup>N</sup> DD E19–G33 |
| Backbone                                                                               | 0.76 $\pm$ 0.25                                                                                              | 0.59 $\pm$ 0.13                                                   |
| All heavy atoms                                                                        | 1.22 $\pm$ 0.21                                                                                              | 1.11 $\pm$ 0.12                                                   |
| Ramachandran statistics (%) <sup>8</sup>                                               |                                                                                                              |                                                                   |
|                                                                                        | Whole construct                                                                                              | P2249–M2277, I20–A31 calculated with PSVS 1.5 <sup>7</sup>        |
| Most favored                                                                           | 82.4                                                                                                         | 98.1                                                              |
| Additionally allowed                                                                   | 15.1                                                                                                         | 1.9                                                               |
| Generously allowed                                                                     | 1.8                                                                                                          | 0.0                                                               |
| Disallowed                                                                             | 0.7                                                                                                          | 0.0                                                               |
| MolProbity scores (percentiles) for the lowest-restraint energy structure <sup>9</sup> |                                                                                                              |                                                                   |
| MolProbity score                                                                       | 1.05                                                                                                         | 100 <sup>th</sup> percentile                                      |

Clash score all-atom 0 100<sup>th</sup> percentile

| Global quality scores (raw score/Z-score) calculated with PSVS 1.5 <sup>7</sup> |                      |                   |
|---------------------------------------------------------------------------------|----------------------|-------------------|
| Verify3D                                                                        |                      | 0.16 ± 0.02/-4.82 |
| ProsaII                                                                         |                      | 0.68 ± 0.06/0.12  |
| Procheck G-factor (phi-psi)                                                     | P2249-M2277, I20-A31 | 0.41/1.93         |
| Procheck G-factor (all)                                                         | P2249-M2277, I20-A31 | 0.36/2.13         |
| Molprobity clashscore                                                           |                      | 0.16 ± 0.45/1.50  |
| Deviations from ideal geometry <sup>6</sup>                                     |                      |                   |
| RMS deviation for bond angles                                                   |                      | 2.25° ± 0.02      |
| RMS deviation for bond lengths                                                  |                      | 0.011 Å ± 0.001   |



**Table S4** Summary of docking domain inter  $\alpha$ -helix angles

| Protein                 | Type of complex formed | Helix 1     | Helix 2     | Angle    |
|-------------------------|------------------------|-------------|-------------|----------|
| TobC <sup>CDD</sup>     | 3HBb                   | P2253–A2262 | Q2267–R2278 | 176 ± 2° |
| VirFG <sup>NDD</sup>    | 4HB                    | D2–D12      | D16–G26     | 172 ± 2° |
| MlnE <sup>NDD</sup>     | 4HB                    | T5–E17      | T21–S31     | 166°     |
| VirA <sup>CDD</sup>     | 4HB                    | S6935–D6948 | S6952–L6959 | 162 ± 4° |
| CurG <sup>CDD</sup>     | 2                      | E1555–Q1564 | S1566–N1583 | 116 ± 1° |
| CurH <sup>NDD</sup>     | 2                      | M1–Q20      | S22–L42     | 141 ± 9° |
| CurK <sup>CDD</sup>     | 2                      | D2208–L2212 | S2213–S2232 | 125 ± 2° |
| Bam_5925 <sup>CDD</sup> | 2-related              | T2620–E2626 | Q2629–G2638 | 125 ± 6° |
| Bam_5924 <sup>NDD</sup> | 2-related              | G9–L21      | S22–L28     | 135 ± 3° |
| PaxA_T1 <sup>CDD</sup>  | *                      | C1062–F1071 | A1073–K1081 | 118 ± 3° |
| PaxB <sup>NDD</sup>     | *                      | N2–L9       | P10–K25     | 131 ± 3° |
| PaxB <sup>CDD</sup>     | 3HBa                   | F3293–E3305 | S3308–G3318 | 119 ± 3° |
| PikAIII <sup>CDD</sup>  | 1b                     | S1543–D1546 | A1549–A1556 | 132 ± 5° |

\*: In this case, the individual DDs resemble type 2(-related) domains, but the overall complex has not yet been classified.

**Table S5** Summary of RMSDs calculated between proteins or complexes in this study

| Protein 1 (residues) ( <i>DD type</i> <sup>a</sup> )                                    | Protein 2 (residues) ( <i>DD type</i> <sup>a</sup> )                                            | RMSD          |
|-----------------------------------------------------------------------------------------|-------------------------------------------------------------------------------------------------|---------------|
| TobC <sup>C</sup> DD (G2255–L2274) ( <i>3HBb</i> )                                      | VirA <sup>C</sup> DD (A6941–L6960) ( <i>4HB</i> )                                               | 0.56 ± 0.07 Å |
|                                                                                         | VirFG <sup>N</sup> DD (E5–L24) ( <i>4HB</i> )                                                   | 0.56 ± 0.05 Å |
|                                                                                         | MlnE <sup>N</sup> DD (Q10–I29) ( <i>4HB</i> )                                                   | 0.74 ± 0.06 Å |
| MlnE <sup>N</sup> DD (Q10–I29) ( <i>4HB</i> )                                           | VirFG <sup>N</sup> DD (E5–L24) ( <i>4HB</i> )                                                   | 0.90 ± 0.06 Å |
|                                                                                         | VirA <sup>C</sup> DD (A6941–L6960) ( <i>4HB</i> )                                               | 0.88 ± 0.06 Å |
| VirA <sup>C</sup> DD (A6941–L6960) ( <i>4HB</i> )                                       | VirFG <sup>N</sup> DD (E5–L24) ( <i>4HB</i> )                                                   | 0.68 ± 0.08 Å |
| PaxB <sup>N</sup> DD (N4–A21) (*)                                                       | CurH <sup>N</sup> DD (Q16–K33) (2)                                                              | 0.64 ± 0.05 Å |
|                                                                                         | Bam_5924 <sup>N</sup> DD (S16–L33) ( <i>2-related</i> )                                         | 0.39 ± 0.09 Å |
| PaxC <sup>N</sup> DD (L11–Q25) ( <i>3HBa</i> )                                          | CurL <sup>N</sup> DD (L16–L30) (PDB ID: 4MYZ) (2)                                               | 0.59 ± 0.09 Å |
| PaxB <sup>C</sup> DD (V3300–L3316) ( <i>3HBa</i> )                                      | CurG <sup>C</sup> DD (L1558–I1574) (2)                                                          | 0.71 ± 0.13 Å |
|                                                                                         | Bam_5925 <sup>C</sup> DD (E2621–L2637) ( <i>2-related</i> )                                     | 0.87 ± 0.06 Å |
|                                                                                         | PaxA_T1 <sup>C</sup> DD (I1064–Y1080) (*)                                                       | 1.40 ± 0.10 Å |
| PaxA_T1 <sup>C</sup> DD (I1064–Y1080) (*)                                               | Bam_5925 <sup>C</sup> DD (E2621–L2637) ( <i>2-related</i> )                                     | 1.41 ± 0.09 Å |
|                                                                                         | CurG <sup>C</sup> DD (L1558–I1574) (2)                                                          | 1.30 ± 0.10 Å |
| CurK <sup>C</sup> DD (D2208–V2221) (2)                                                  | Bam_5925 <sup>C</sup> DD (E2624–L2637) ( <i>2-related</i> )                                     | 0.95 ± 0.14 Å |
|                                                                                         | CurG <sup>C</sup> DD (E1561–I1574) (2)                                                          | 0.69 ± 0.13 Å |
|                                                                                         | PaxB <sup>C</sup> DD (E3303–L3316) ( <i>3HBa</i> )                                              | 0.92 ± 0.11 Å |
|                                                                                         | PaxA_T1 <sup>C</sup> DD (Q1067–Y1080) (*)                                                       | 1.29 ± 0.16 Å |
| PikAIII <sup>C</sup> DD (S1543–A1556) ( <i>1b</i> )                                     | CurK <sup>C</sup> DD (D2208–V2221) (2)                                                          | 0.58 ± 0.15 Å |
|                                                                                         | CurG <sup>C</sup> DD (E1561–I1574) (2)                                                          | 0.54 ± 0.04 Å |
|                                                                                         | Bam_5925 <sup>C</sup> DD (E2624–L2637) ( <i>2-related</i> )                                     | 0.69 ± 0.08 Å |
|                                                                                         | PaxB <sup>C</sup> DD (E3303–L3316) ( <i>3HBa</i> )                                              | 0.74 ± 0.05 Å |
|                                                                                         | PaxA_T1 <sup>C</sup> DD (Q1067–Y1080) (*)                                                       | 1.38 ± 0.05 Å |
| Complex 1 (residues) ( <i>DD type</i> )                                                 | Complex 2 (residues) ( <i>DD type</i> )                                                         | RMSD          |
| PaxB <sup>C</sup> DD/PaxC <sup>N</sup> DD<br>(V3300–L3316/D9–I20) ( <i>3HBa</i> )       | CurG <sup>C</sup> DD/ CurH <sup>N</sup> DD<br>(L1558–I1574/S22–K33) (2)                         | 1.13 ± 0.07 Å |
|                                                                                         | Bam_5925 <sup>C</sup> DD/Bam_5924 <sup>N</sup> DD<br>(E2621–L2637/S22–L33) ( <i>2-related</i> ) | 1.18 ± 0.07 Å |
| CurK <sup>C</sup> DD/ CurL <sup>N</sup> DD <sup>b</sup><br>(D2208–K2230/S12–K32) (2)    | CurG <sup>C</sup> DD/ CurH <sup>N</sup> DD<br>(E1561–N1583/ Q20–N40) (2)                        | 1.96 Å        |
| CurL <sup>N</sup> DD/ CurL <sup>N</sup> DD <sup>b</sup> (PDB ID: 4MYZ)<br>(S12–T35) (2) | CurL <sup>N</sup> DD CurL <sup>N</sup> DD (PDB ID: 4MZ0)<br>(S12–T35) (2)                       | 1.66 Å        |
| CurK <sup>C</sup> DD/ CurL <sup>N</sup> DD<br>(I2215–E2226/S14–K32) (2)                 | DEBS 2 <sup>C</sup> DD/ DEBS 3 <sup>N</sup> DD<br>(D3551–G3562/R14–E32) ( <i>1a</i> )           | 2.51 ± 0.20 Å |
| CurK <sup>C</sup> DD/ CurL <sup>N</sup> DD<br>(D2208–L2222/S14–E31) (2)                 | PikAIII <sup>C</sup> DD/ PikAIV <sup>N</sup> DD<br>(S1543–L1557/D10–R27) ( <i>1b</i> )          | 2.05 Å        |
| CurK <sup>C</sup> DD/ CurL <sup>N</sup> DD<br>(I2209–E2226/S14–E31) (2)                 | Bam_5920 <sup>C</sup> DD/ 5919 <sup>N</sup> DD<br>(D2956–G2973/Q6–Q23) ( <i>1-related</i> )     | 1.77 ± 0.12 Å |
| CurK <sup>C</sup> DD/ CurL <sup>N</sup> DD<br>(D2208–V2221/S14–K29) (2)                 | Bam_5925 <sup>C</sup> DD/ 5924 <sup>N</sup> DD<br>(E2624–L2637/S22–Q37) ( <i>2-related</i> )    | 5.72 ± 0.11 Å |

|                                                                                            |                                                                                             |               |
|--------------------------------------------------------------------------------------------|---------------------------------------------------------------------------------------------|---------------|
| PikAIII <sup>C</sup> DD/ PikAIV <sup>N</sup> DD<br>(L1547–L1557/S3–R29) ( <i>1b</i> )      | DEBS 2 <sup>C</sup> DD/ DEBS 3 <sup>N</sup> DD<br>(A3548–D3558/M7–V33) ( <i>1a</i> )        | 2.54 ± 0.10 Å |
| PikAIII <sup>C</sup> DD/ PikAIV <sup>N</sup> DD<br>(S1543–G1558/D10–D31) ( <i>1b</i> )     | CurG <sup>C</sup> DD/CurH <sup>N</sup> DD<br>(E1561–Q1576/S22–H43) ( <i>2</i> )             | 2.03 Å        |
| PikAIII <sup>C</sup> DD/ PikAIV <sup>N</sup> DD<br>(I1544–G1558/N5–Q34) ( <i>1b</i> )      | Bam_5920 <sup>C</sup> DD/5919 <sup>N</sup> DD<br>(D2956–Q2970/M1–R30) ( <i>1-related</i> )  | 2.46 ± 0.15 Å |
| PikAIII <sup>C</sup> DD/ PikAIV <sup>N</sup> DD<br>(S1543–A1556/A11–S26) ( <i>1b</i> )     | Bam_5925 <sup>C</sup> DD/5924 <sup>N</sup> DD<br>(E2624–L2637/S22–Q37) ( <i>2-related</i> ) | 5.79 ± 0.11 Å |
| DEBS 2 <sup>C</sup> DD/ DEBS 3 <sup>N</sup> DD<br>(A3548–G3562/R14–H35) ( <i>1a</i> )      | CurG <sup>C</sup> DD/CurH <sup>N</sup> DD<br>(S1565–E1579/S22–H43) ( <i>2</i> )             | 2.06 ± 0.08 Å |
| DEBS 2 <sup>C</sup> DD/ DEBS 3 <sup>N</sup> DD<br>(A3548–G3563/L12–R36) ( <i>1a</i> )      | Bam_5920 <sup>C</sup> DD/5919 <sup>N</sup> DD<br>(L2959–D2974/I4–A28) ( <i>1-related</i> )  | 2.48 ± 0.17 Å |
| DEBS 2 <sup>C</sup> DD/ DEBS 3 <sup>N</sup> DD<br>(S3549–L3557/Y15–L30) ( <i>1a</i> )      | Bam_5925 <sup>C</sup> DD/5924 <sup>N</sup> DD<br>(Q2629–L2637/S22–Q37) ( <i>2-related</i> ) | 4.63 ± 0.11 Å |
| CurG <sup>C</sup> DD/CurH <sup>N</sup> DD<br>(I1562–E1579/ S22–H43) ( <i>2</i> )           | Bam_5920 <sup>C</sup> DD/5919 <sup>N</sup> DD<br>(D2956–G2973/Q6–Q27) ( <i>1-related</i> )  | 1.71 ± 0.11 Å |
| CurG <sup>C</sup> DD/CurH <sup>N</sup> DD<br>(E1561–I1574/ Q17–K37) ( <i>2</i> )           | Bam_5925 <sup>C</sup> DD/5924 <sup>N</sup> DD<br>(E2624–L2637/R17–Q37) ( <i>2-related</i> ) | 5.64 ± 0.11 Å |
| Bam_5920 <sup>C</sup> DD/5919 <sup>N</sup> DD<br>(D2956–L2968/L7–N22) ( <i>1-related</i> ) | Bam_5925 <sup>C</sup> DD/5924 <sup>N</sup> DD<br>(I2625–L2637/S22–Q37) ( <i>2-related</i> ) | 5.45 ± 0.17 Å |

<sup>a</sup>The ‘type’ designations refer to the initial classification of the DDs based on their structures within the docked complexes. \*: In this case, the individual DDs resemble type 2(-related) domains, but the overall complex has not yet been classified.

**Table S6** Summary of TM scores calculated between proteins or complexes in this study

| Protein 1 ( <i>DD type</i> <sup>a</sup> )                                   | Protein 2 ( <i>DD type</i> <sup>a</sup> )                                             | TM score (min/max)      |
|-----------------------------------------------------------------------------|---------------------------------------------------------------------------------------|-------------------------|
| TobC <sup>C</sup> DD (T2252–L2275)<br>(3HBb)                                | VirFG <sup>N</sup> DD (D2–A25) (4HB)                                                  | 0.66 ± 0.04 (0.55/0.77) |
|                                                                             | VirA <sup>C</sup> DD (D6938–T6961) (4HB)                                              | 0.62 ± 0.04 (0.49/0.71) |
|                                                                             | MlnE <sup>N</sup> DD (Q7–K30) (4HB)                                                   | 0.57 ± 0.03 (0.53/0.63) |
| MlnE <sup>N</sup> DD (Q7–K30) (4HB)                                         | VirA <sup>C</sup> DD (D6938–T6961) (4HB)                                              | 0.49 ± 0.01 (0.47/0.52) |
|                                                                             | VirFG <sup>N</sup> DD (D6938–T6961) (4HB)                                             | 0.51 ± 0.02 (0.47/0.54) |
| VirA <sup>C</sup> DD (D6938–T6961)<br>(4HB)                                 | VirFG <sup>N</sup> DD (D6938–T6961) (4HB)                                             | 0.64 ± 0.04 (0.54/0.72) |
| PaxB <sup>N</sup> DD (N3–K25) (*)                                           | Bam_5924 <sup>N</sup> DD (L15–Q37) (2-related)                                        | 0.47 ± 0.03 (0.39/0.59) |
|                                                                             | CurH <sup>N</sup> DD <sup>§</sup> (K15–K37) (2)                                       | 0.51 ± 0.02 (0.47/0.55) |
|                                                                             | CurH <sup>N</sup> DD <sup>¶</sup> (K15–K37) (2)                                       | 0.48 ± 0.03 (0.42/0.51) |
|                                                                             | CurH <sup>N</sup> DD overall (2)                                                      | 0.49 ± 0.03 (0.42/0.55) |
| PaxC <sup>N</sup> DD (E5–Q25) (3HBa)                                        | CurL <sup>N</sup> DD (K9–K29) 4MYZ (2)                                                | 0.40 ± 0.03 (0.33/0.49) |
|                                                                             | CurL <sup>N</sup> DD (K9–K29) 4MZ0 (2)                                                | 0.45 ± 0.03 (0.39/0.49) |
| PaxB <sup>C</sup> DD (A3296–Q3320)<br>(3HBa)                                | CurG <sup>C</sup> DD <sup>§</sup> (L1554–L1578) (2)                                   | 0.51 ± 0.03 (0.44/0.56) |
|                                                                             | CurG <sup>C</sup> DD <sup>¶</sup> (L1554–L1578) (2)                                   | 0.39 ± 0.02 (0.35/0.43) |
|                                                                             | CurG <sup>C</sup> DD overall (2)                                                      | 0.45 ± 0.07 (0.35/0.56) |
|                                                                             | Bam_5925 <sup>C</sup> DD (P2617–F2641) (2-related)                                    | 0.39 ± 0.03 (0.31/0.47) |
|                                                                             | PaxA T1- <sup>C</sup> DD (E1060–E1084) (*)                                            | 0.41 ± 0.04 (0.33/0.53) |
| PaxA T1- <sup>C</sup> DD<br>(E1060–E1084) (*)                               | CurG <sup>C</sup> DD <sup>§</sup> (L1554–L1578) (2)                                   | 0.39 ± 0.02 (0.36/0.42) |
|                                                                             | CurG <sup>C</sup> DD <sup>¶</sup> (L1554–L1578) (2)                                   | 0.38 ± 0.03 (0.34/0.42) |
|                                                                             | CurG <sup>C</sup> DD overall (2)                                                      | 0.39 ± 0.02 (0.34/0.42) |
|                                                                             | Bam_5925 <sup>C</sup> DD (P2617–F2641) (2-related)                                    | 0.31 ± 0.03 (0.25/0.43) |
| PikAIII <sup>C</sup> DD (S1543–L1557)<br>(1b)                               | CurK <sup>C</sup> DD (D2208–Q2223) (2)                                                | 0.58 ± 0.03 (0.53/0.63) |
|                                                                             | CurG <sup>C</sup> DD <sup>§</sup> (L1554–L1578) (2)                                   | 0.67 ± 0.00 (0.67/0.67) |
|                                                                             | CurG <sup>C</sup> DD <sup>¶</sup> (L1554–L1578) (2)                                   | 0.54 ± 0.07 (0.50/0.59) |
|                                                                             | CurG <sup>C</sup> DD overall (2)                                                      | 0.61 ± 0.08 (0.50/0.67) |
|                                                                             | Bam_5925 <sup>C</sup> DD (P2617–F2641) (2-related)                                    | 0.49 ± 0.03 (0.43/0.58) |
|                                                                             | PaxB <sup>C</sup> DD (D3296–Q3320) (3HBa)                                             | 0.49 ± 0.03 (0.42/0.54) |
|                                                                             | PaxA T1- <sup>C</sup> DD (E1060–E1084) (*)                                            | 0.46 ± 0.03 (0.40/0.54) |
| Di-domain <sup>C</sup> DD/ <sup>N</sup> DD 1                                | Di-domain <sup>C</sup> DD/ <sup>N</sup> DD 2                                          | TM score (min/max)      |
| PaxB <sup>C</sup> DD/PaxC <sup>N</sup> DD<br>(Q3288–Q3321/M1–Y33)<br>(3HBa) | CurG <sup>C</sup> DD/CurH <sup>N</sup> DD <sup>§</sup><br>(N1551–N1583/M1–E44) (2)    | 0.50 ± 0.01 (0.48/0.52) |
|                                                                             | CurG <sup>C</sup> DD/CurH <sup>N</sup> DD <sup>¶</sup><br>(N1551–N1583/M1–E44) (2)    | 0.51 ± 0.04 (0.37/0.54) |
|                                                                             | CurG <sup>C</sup> DD/CurH <sup>N</sup> DD overall (2)                                 | 0.51 ± 0.04 (0.37/0.54) |
|                                                                             | Bam_5925 <sup>C</sup> DD/Bam_5924 <sup>N</sup> DD<br>(A2616–E2644/M1–G41) (2-related) | 0.49 ± 0.01 (0.45/0.54) |
| <sup>N</sup> DD/ <sup>N</sup> DD (1) <sup>a</sup>                           | <sup>N</sup> DD/ <sup>N</sup> DD (2)                                                  | TM score (min/max)      |
| CurL (S14–E34)/CurL (PDB<br>ID: 4MZ0) (S13–T35) (2)                         | CurL(S14–E34)/CurL (PDB ID: 4MYZ)<br>(S14–T35) (2)                                    | 0.70                    |

| <sup>C</sup> DD/ <sup>N</sup> DD complex 1                                        | <sup>C</sup> DD/ <sup>N</sup> DD complex 2                                         | TM score (min/max)      |
|-----------------------------------------------------------------------------------|------------------------------------------------------------------------------------|-------------------------|
| CurK <sup>C</sup> DD/CurL <sup>N</sup> DD<br>(D2208–A2227/S14–E34) (2)            | CurG <sup>C</sup> DD/Cur <sup>N</sup> DD H (E1561–N1583/Q20–H43) (2)               | 0.68                    |
|                                                                                   | PikAIII <sup>C</sup> DD/ PikAIV <sup>N</sup> DD<br>(S1543–G1558/S3–R33) (1b)       | 0.58                    |
|                                                                                   | DEBS 2 <sup>C</sup> DD/ DEBS 3 <sup>N</sup> DD<br>(A3548–G3563/M7–A37) (1a)        | 0.56 ± 0.02 (0.54/0.59) |
|                                                                                   | Bam_5920 <sup>C</sup> DD 5919 <sup>N</sup> DD<br>(D2956–G2973/M1–R30) (1-related)  | 0.66 ± 0.01 (0.64/0.68) |
| PikAIII <sup>C</sup> DD/ PikAIV <sup>N</sup> DD<br>(S1543–G1558/S3–R33) (1b)      | Bam_5925 <sup>C</sup> DD 5924 <sup>N</sup> DD<br>(E2624–E2644/R17–G41) (2-related) | 0.42 ± 0.01 (0.40/0.45) |
|                                                                                   | DEBS 2 <sup>C</sup> DD/ DEBS 3 <sup>N</sup> DD<br>(A3548–G3563/M7–A37) (1a)        | 0.60 ± 0.01 (0.61/0.64) |
|                                                                                   | CurG <sup>C</sup> DD/Cur <sup>N</sup> DD H<br>(E1561–N1583/Q20–H43) (2)            | 0.67                    |
|                                                                                   | Bam_5920 <sup>C</sup> DD 5919 <sup>N</sup> DD<br>(D2956–G2973/M1–R30) (1-related)  | 0.74 ± 0.02 (0.70/0.77) |
| DEBS 2 <sup>C</sup> DD/ DEBS 3 <sup>N</sup> DD<br>(A3548–G3563/M7–A37) (1a)       | Bam_5925 <sup>C</sup> DD 5924 <sup>N</sup> DD<br>(E2624–E2644/R17–G41) (2-related) | 0.48 ± 0.01 (0.46/0.50) |
|                                                                                   | CurG <sup>C</sup> DD/Cur <sup>N</sup> DD H<br>(E1561–N1583/Q20–H43) (2)            | 0.62 ± 0.01 (0.61/0.64) |
|                                                                                   | Bam_5920 <sup>C</sup> DD 5919 <sup>N</sup> DD<br>(D2956–G2973/M1–R30) (1-related)  | 0.65 ± 0.02 (0.59/0.69) |
|                                                                                   | Bam_5925 <sup>C</sup> DD 5924 <sup>N</sup> DD<br>(E2624–E2644/R17–G41) (2-related) | 0.39 ± 0.02 (0.34/0.43) |
| CurG <sup>C</sup> DD/Cur <sup>N</sup> DD H<br>(E1561–N1583/Q20–H43) (2)           | Bam_5920 <sup>C</sup> DD 5919 <sup>N</sup> DD<br>(D2956–G2973/M1–R30) (1-related)  | 0.72 ± 0.01 (0.70/0.73) |
|                                                                                   | Bam_5925 <sup>C</sup> DD 5924 <sup>N</sup> DD<br>(E2624–E2644/R17–G41) (2-related) | 0.48 ± 0.01 (0.46/0.50) |
| Bam_5920 <sup>C</sup> DD 5919 <sup>N</sup> DD<br>(D2956–G2973/M1–R30) (1-related) | Bam_5925 <sup>C</sup> DD 5924 <sup>N</sup> DD<br>(E2624–E2644/R17–G41) (2-related) | 0.45 ± 0.01 (0.42/0.48) |

<sup>a</sup>The ‘type’ designations refer to the initial classification of the DDs based on their structures within the docked complexes. The symbols § and ¶ refer to distinct conformers observed in the crystal structures. \*: In this case, the individual DDs resemble type 2(-related) domains, but the overall complex has not yet been classified.

## Supplementary References

- 1 D. W. A. Buchan and D. T. Jones, *Nucleic Acids Res.*, 2019, 47, W402–W407.
- 2 G. Erdős, M. Pajkos and Z. Dosztányi, *Nucleic Acids Res.*, 2021, 49, W297–W303.
- 3 J. Jumper, R. Evans, A. Pritzel, T. Green, M. Figurnov, O. Ronneberger, K. Tunyasuvunakool, R. Bates, A. Žídek, A. Potapenko, A. Bridgland, C. Meyer, S. A. A. Kohl, A. J. Ballard, A. Cowie, B. Romera-Paredes, S. Nikolov, R. Jain, J. Adler, T. Back, S. Petersen, D. Reiman, E. Clancy, M. Zielinski, M. Steinegger, M. Pacholska, T. Berghammer, S. Bodenstein, D. Silver, O. Vinyals, A. W. Senior, K. Kavukcuoglu, P. Kohli and D. Hassabis, *Nature*, 2021, 596, 583–589.
- 4 J. Dorival, T. Annaval, F. Risser, S. Collin, P. Roblin, C. Jacob, A. Gruez, B. Chagot and K. J. Weissman, *J. Am. Chem. Soc.*, 2016, 138, 12, 4155–416.
- 5 J. Zeng, D. T. Wagner, Z. Zhang, L. Moretto, J. D. Addison and A. T. Keatinge-Clay, *ACS Chem. Biol.*, 2016, 11, 2466–2474.
- 6 D. A. Case, T. E. Cheatham III, T. Darden, H. Gohlke, R. Luo, K. M. Merz Jr., A. Onufriev, C. Simmerling, B. Wang and R. J. Woods, *J. Comput. Chem.*, 2005, 26, 1668–1688.
- 7 G. T. Montelione, M. Nilges, A. Bax, P. Güntert, T. Herrmann, J. S. Richardson, C. D. Schwieters, W. F. Vranken, G. W. Vuister, D. S. Wishart, H. M. Berman, G. J. Kleywegt and J. L. Markley, *Structure*, 2013, 21, 1563–1570.
- 8 R. A. Laskowski, J. A. Rullmann, M. W. MacArthur, R. Kaptein and J. M. Thornton, *J. Biomol. NMR*, 1996, 8, 477–86.
- 9 V. B. Chen, W. B. Arendall, J. J. Headd, D. A. Keedy, R. M. Immormino, G. J. Kapral, L. W. Murray, J. S. Richardson and D. C. Richardson, *Acta Crystallogr. Biol. Crystallogr.*, 2010, 66, 12–21.
